# Supplementary material for: TGF-β broadly modifies rather than specifically suppresses reactivated memory CD8 T cells in a dose-dependent manner
Source: PubMed Central journal article supplement — Proc Natl Acad Sci U S A. 2023 Nov 21;120(48):e2313228120. doi: 10.1073/pnas.2313228120 (PMC10691214; doi:10.1073/pnas.2313228120), 2023-11-21
Supplement: pnas.2313228120.sapp.pdf [file pnas.2313228120.sapp.pdf]

## **Supporting Information for**

TGF- $\beta$  broadly modifies rather than specifically suppresses reactivated memory CD8 T cells in a dose-dependent manner.

Alexis Taber, Andrew Konecny, Shannon Oda, James Scott-Browne, and Martin Prlic

Corresponding author: Martin Prlic  
Email: [mprlic@fredhutch.org](mailto:mprlic@fredhutch.org)

### **This PDF file includes:**

Figures S1 to S9  
Tables S1 to S3

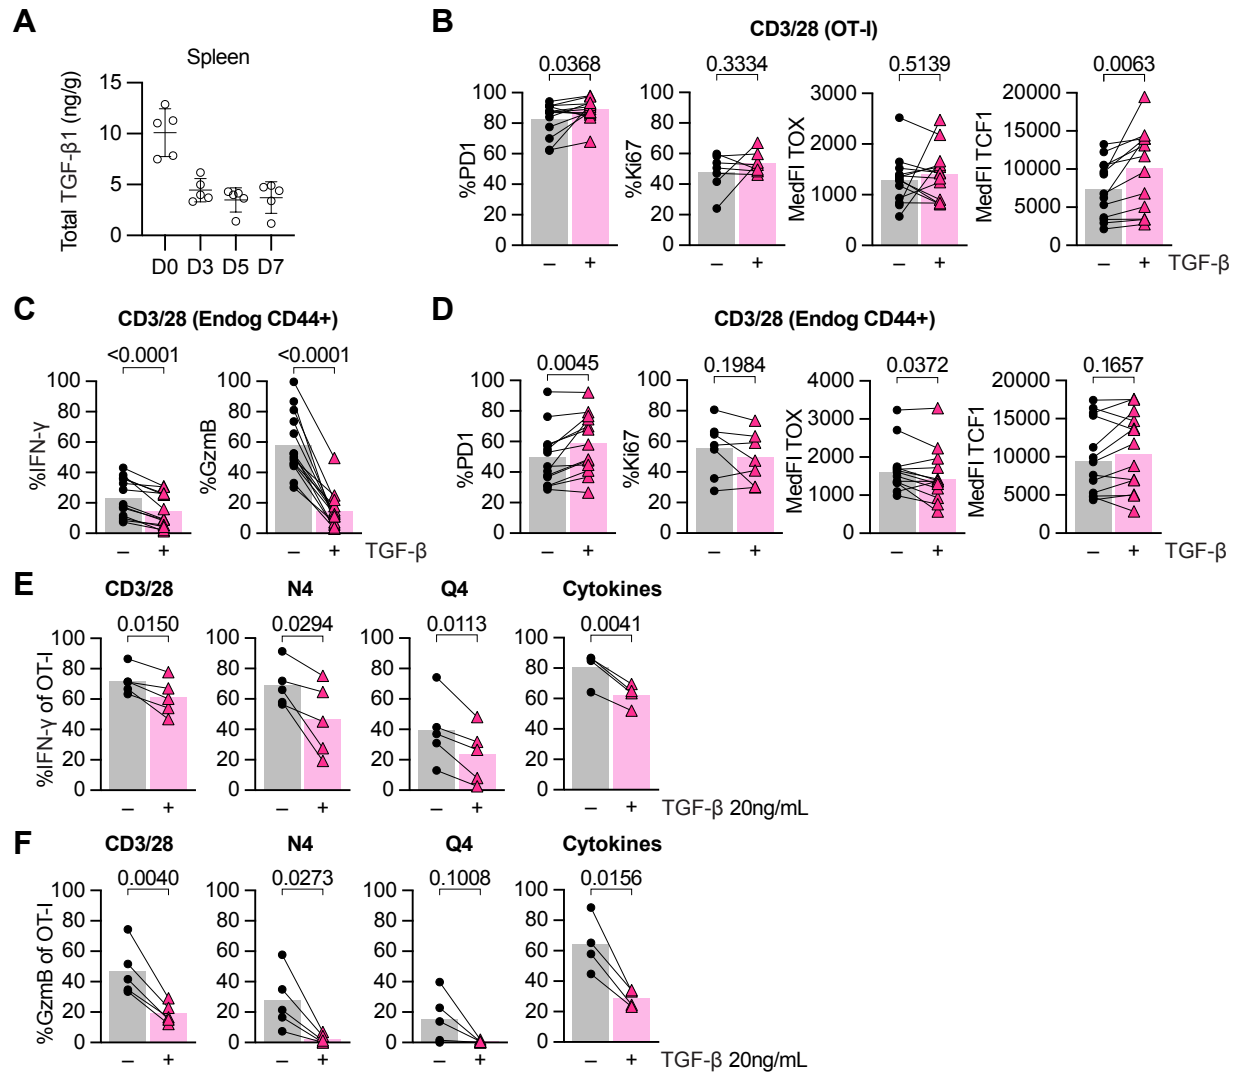

**Figure S1: TGF- $\beta$  increases PD-1 but not other markers of activation on memory CD8+ T cells**

See Figure 1A for experimental setup. Enriched T cells were stimulated for 24 hours with CD3/28 in the presence or absence of TGF- $\beta$  at 100ng/mL. **(A)** Total levels of extracellular TGF- $\beta$ 1 measured by ELISA from spleen of C67BL/6J mice at indicated infection timepoints (n = 5 animals). Infection was  $4 \times 10^3$  CFU LM-OVA on Day 0. **(B)** Frequencies of PD1 and Ki67 and median fluorescence intensity (MedFI) of Tox and TCF1 in OT-1 T<sub>mem</sub>. **(C)** Frequencies of IFN- $\gamma$ , GzmB, **(D)** PD1, Ki67, and MedFI of Tox and TCF1 in endogenous CD44+ T cells. In **(B - D)** n = 13 animals for all markers except Ki67 n = 7. **(E)** Frequencies of IFN- $\gamma$  and **(F)** GzmB of OT-I T<sub>mem</sub> at 24h across indicated stimulation conditions with or without TGF- $\beta$  at 20ng/mL. In **(E and F)** CD3/28, N4, and Q4 n = 5 animals, and Cyt n = 4. Statistical significances were calculated using paired t tests. Data shown are from 4 to 11 independent experiments.

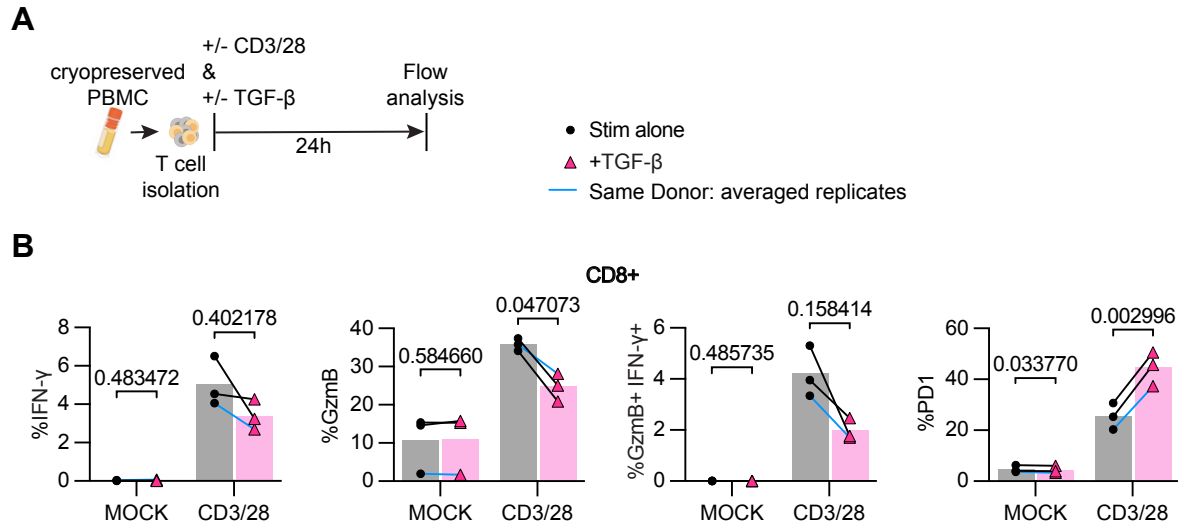

**Figure S2: TGF- $\beta$  inhibits cytotoxicity of CD8+ T cells from human PBMC**

**(A)** Schematic of T cell isolation with magnet-activated cell sorting (MACS) from de-identified human PBMC and subsequent ex vivo stimulation and analysis. Human T cells were cultured in human RP10 media (RPMI 1640 supplemented with 10% FBS, 2mM L-glutamine, and 100 U/mL penicillin-streptomycin) with recombinant human TGF- $\beta$ 1 (PeproTech Cat #100-21), Dynabeads human T-Activator (Thermo Fisher) anti-CD3/CD28 beads (at a 1:1 bead/cell ratio), or with media alone. Stimulation was 24 hours with anti-CD3/CD28 microbeads in the presence or absence of TGF- $\beta$  at 100ng/mL. **(B)** Frequencies of indicated markers in all CD8+ T cells (n = 3 donors). Experimental repeats belonging to the same donor are averaged and indicated by the blue line (4 replicates). Statistical significances were calculated using multiple paired t tests. Data shown are from 4 independent experiments.

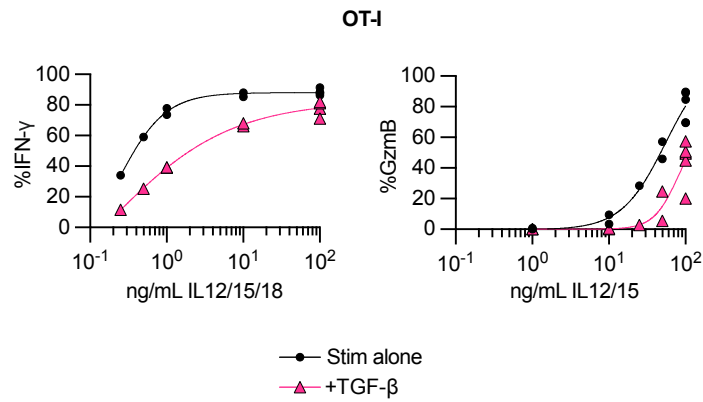

**Figure S3: Pro-inflammatory cytokine abundance determines the susceptibility of OT-I  $T_{mem}$  to inhibition by TGF- $\beta$**

See figure 1A for experimental setup. Stimulation was 24h with IL-12, IL-15, and IL-18 or IL-12 and IL-15 at the indicated (titrated) concentrations with or without TGF- $\beta$  at 100ng/mL. Frequencies of IFN- $\gamma$  and Gzmb by OT-I  $T_{mem}$  (n = 3 animals). Data shown are from 3 independent experiments.

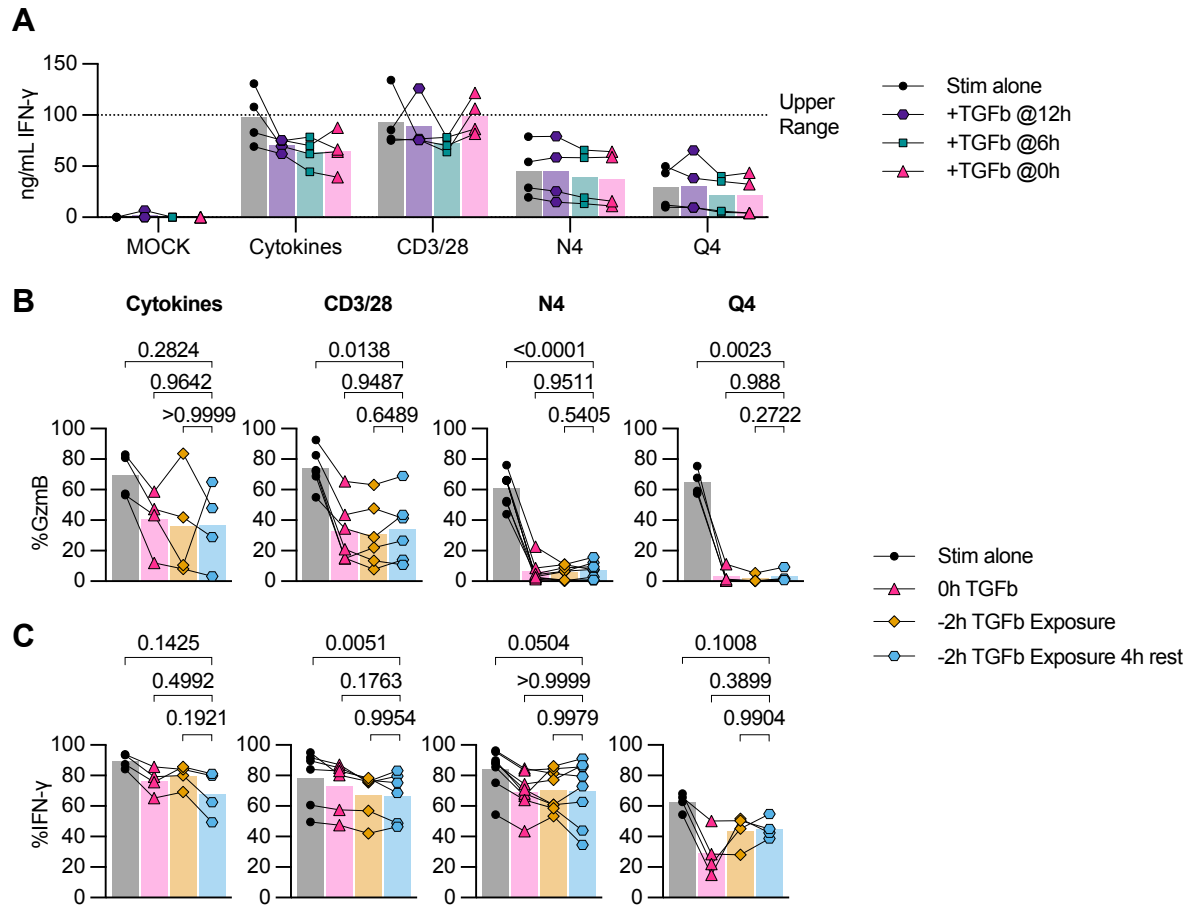

**Figure S4: TGF- $\beta$  exposed OT-I T<sub>mem</sub> do not regain full cytotoxic function after short rest period**

(A) IFN- $\gamma$  levels measured by ELISA from supernatant of ex vivo experiments described in Figure 3A (n = 4 animals). (B and C) Stimulated OT-I T<sub>mem</sub> from experiments outlined in Figure 3D including an additional condition of a 4-hour rest in fresh media between TGF- $\beta$  exposure and activating stimulation. (B) Frequencies of GzmB and (C) IFN- $\gamma$  in OT-I T<sub>mem</sub> compared across stimulation conditions (CD3/28 n = 6 animals, N4 n = 8, Q4 and Cyt n = 4). All indicated statistical significances were calculated using one-way ANOVA. Data shown are from 3 to 7 independent experiments.

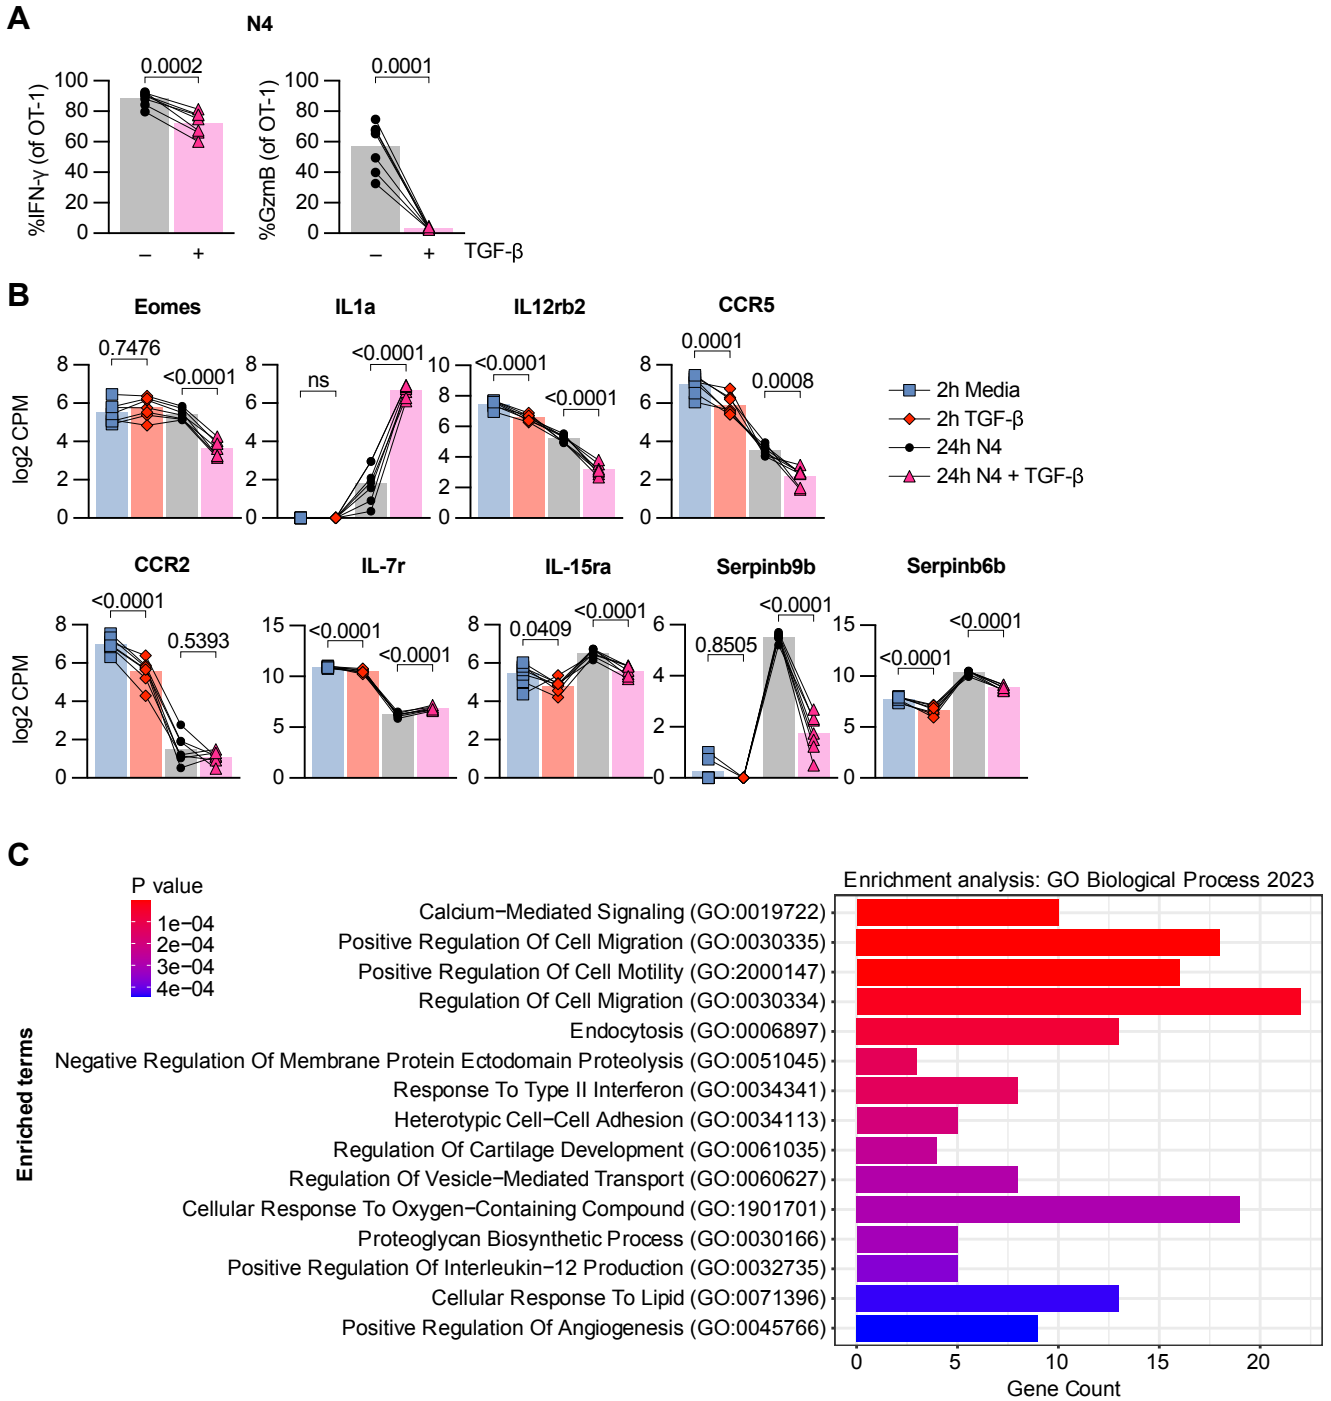

**Figure S5: TGF- $\beta$  induces transcriptional changes associated with cell migration in OT-I T<sub>mem</sub>**  
**(A)** Frequencies of IFN- $\gamma$  and GzmB in OT-I T<sub>mem</sub> from mice used for ATAC- and RNA-seq after 24h N4 stimulation with or without TGF- $\beta$  at 100ng/mL ( $n = 7$  animals). Statistical significances were calculated using paired t tests. **(B)** Selected DE genes from RNA-seq and calculated adj. P values. **(C)** Enrichment analysis of RNAseq data from GO Biological Process 2023 database. Data shown are from 2 independent experiments.

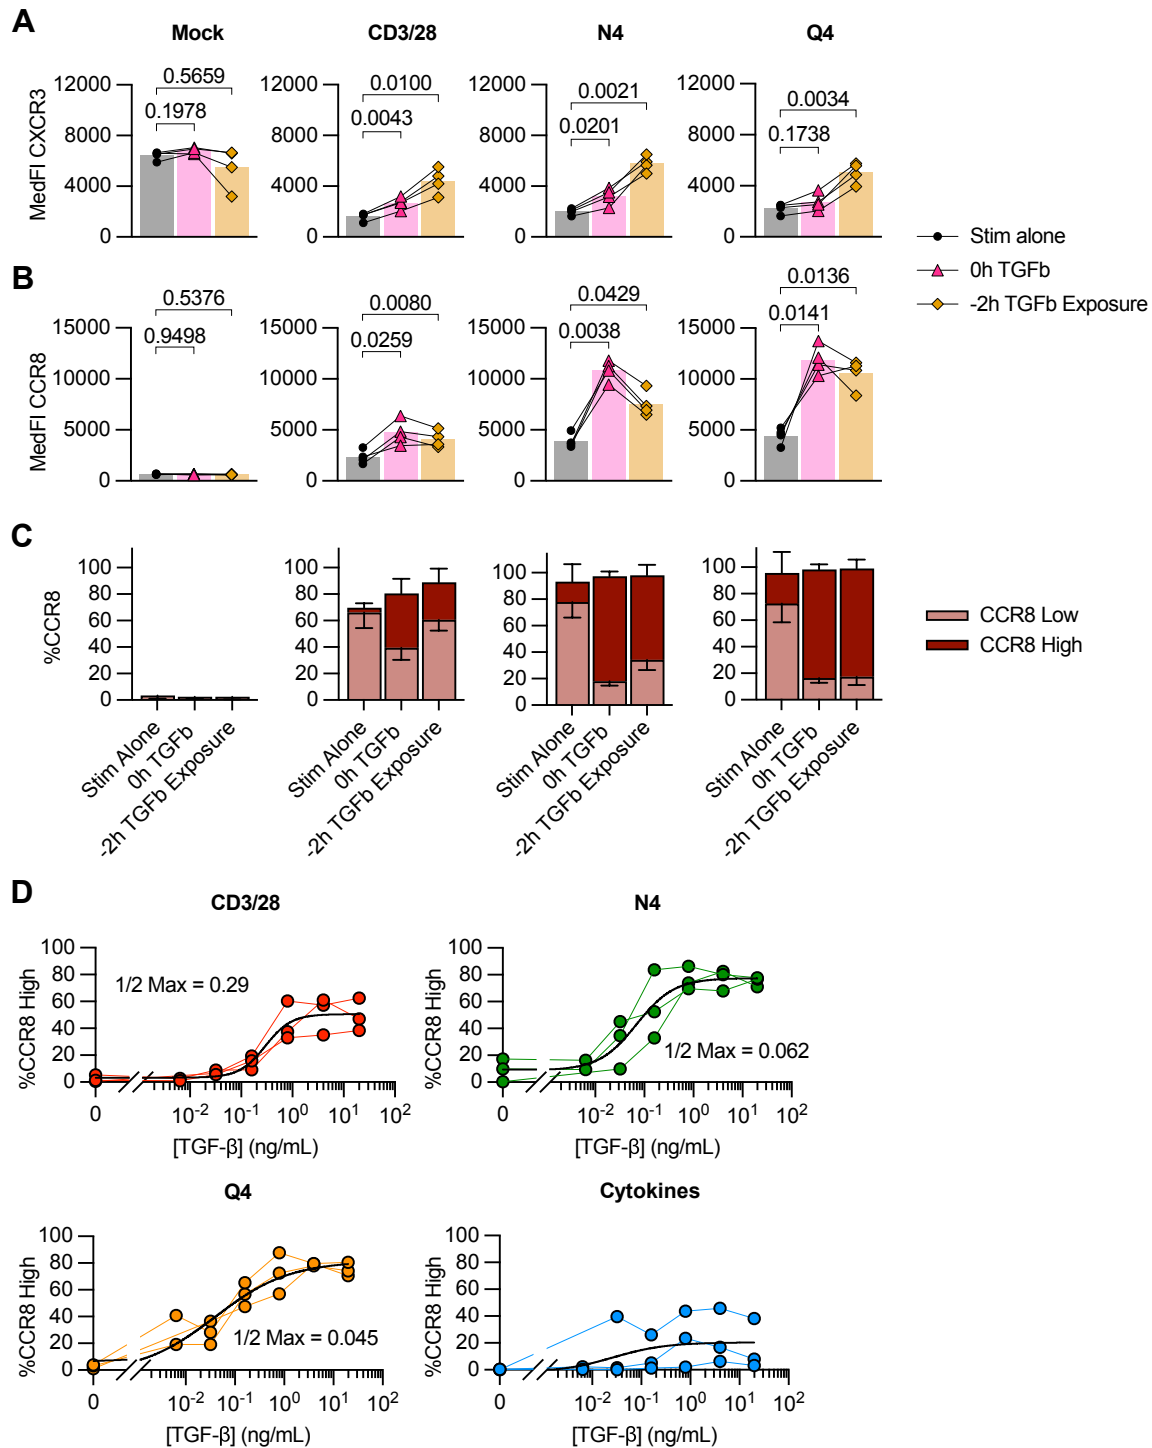

**Figure S6: TGF- $\beta$  induces chemokine receptor expression in OT-I  $T_{mem}$  in a dose-dependent manner**  
**(A - C)** See Figure 3D for experimental setup. **(A)** MedFI CXCR3 and **(B)** MedFI CCR8 in OT-I  $T_{mem}$ . **(C)** Frequency of low and high CCR8 expression by flow cytometry in OT-I  $T_{mem}$  ( $n = 4$  animals). **(D)** Frequency of CCR8-high expression by flow cytometry across stimulation conditions in the presence of titrated TGF- $\beta$  ( $n = 3$ ). TGF- $\beta$  was titrated in five-fold dilutions starting with 20ng/mL and ending at 0.032ng/mL. Data shown are from 2 to 3 independent experiments.

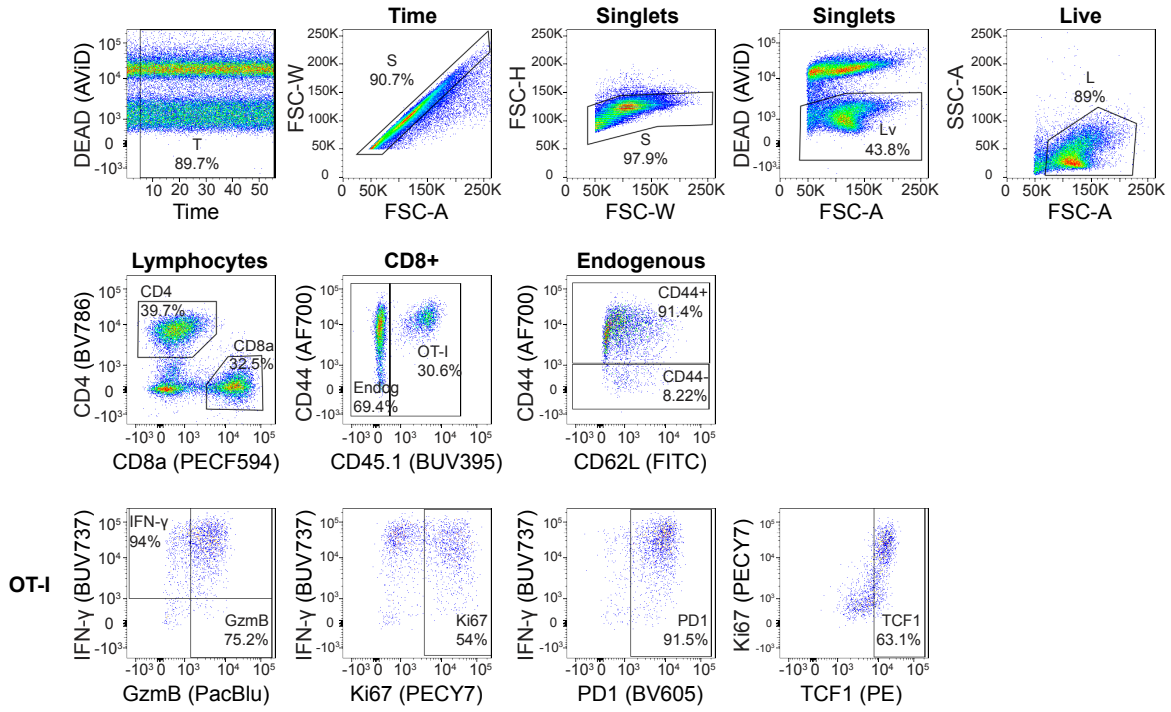

**Figure S7: Representative flow gating for T cells isolated from OT-I memory mice**  
 Related to Fig.1, 2, 3, Supplemental Fig. 1, 3, 4. Stimulation was 24h with plate-bound CD3/28.



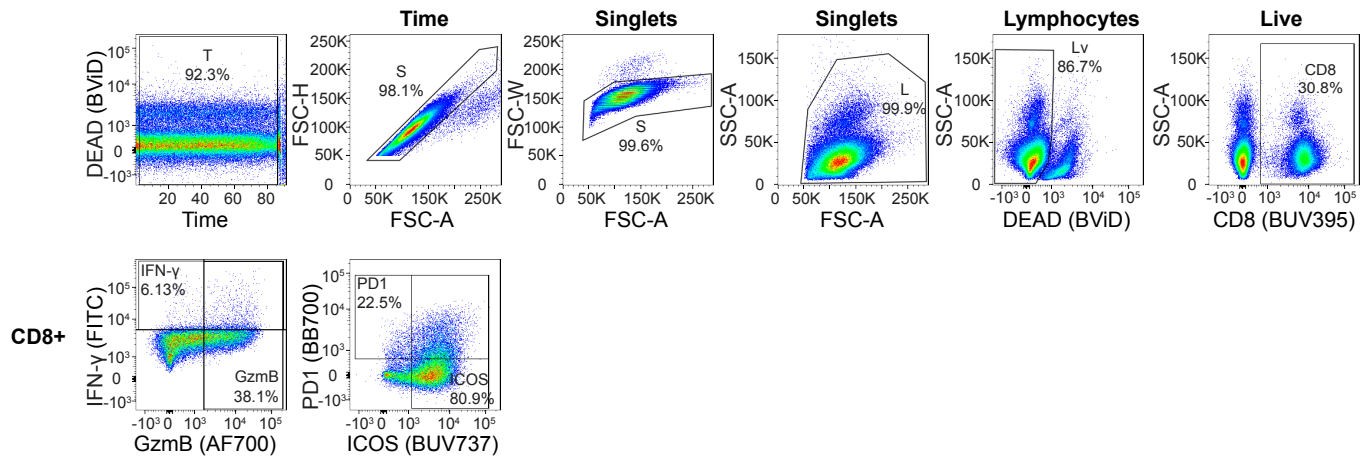

**Figure S8: Representative flow gating for T cells isolated from human PBMC**  
 Related to Supplemental Fig. 2. Stimulation was 24 hours with anti-CD3/CD28 microbeads.

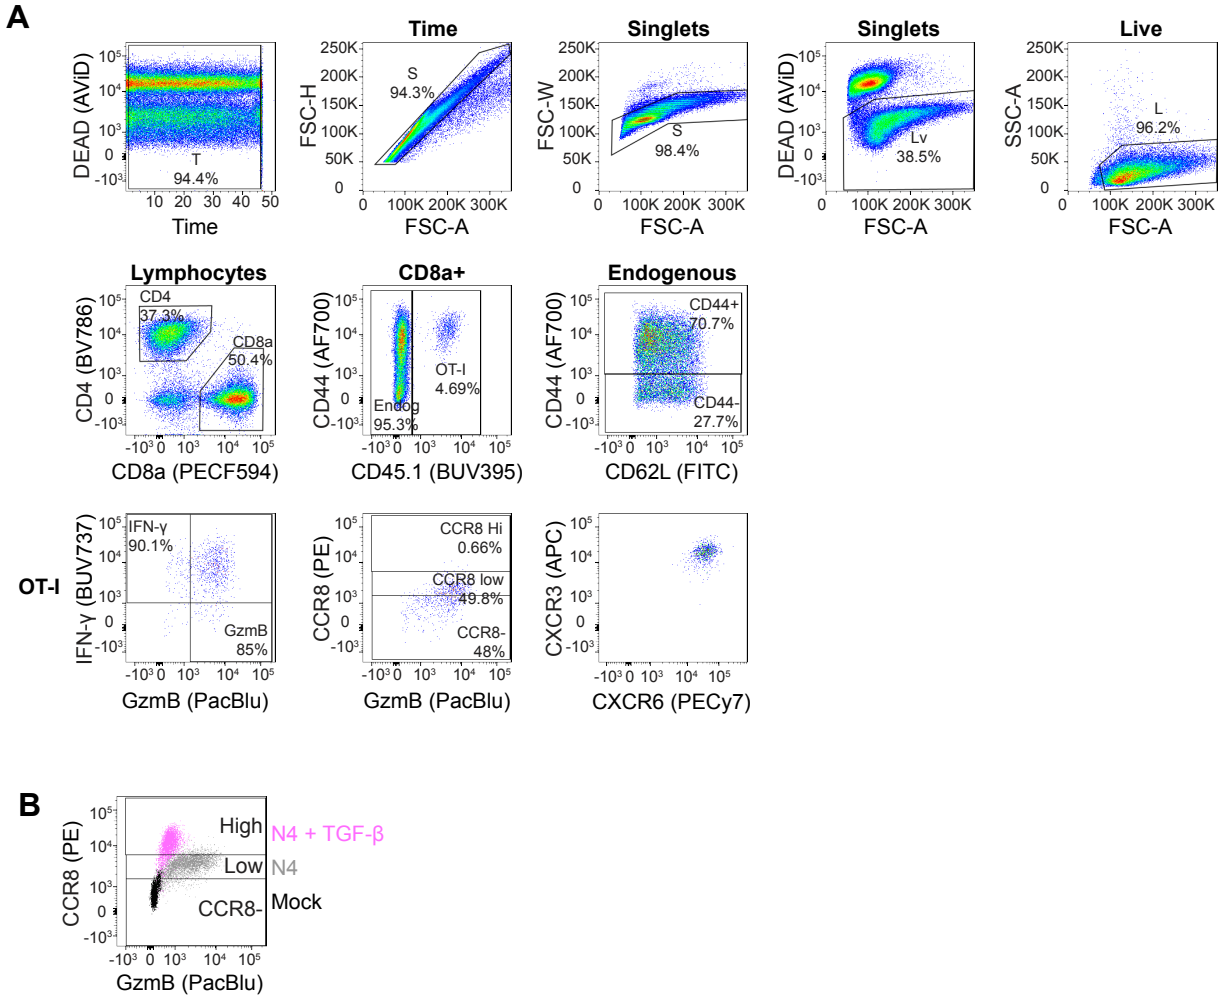

**Figure S9: Representative flow gating for T cells isolated from OT-I memory mice** Related to Fig. 5, Supplemental Fig. 6. **(A)** Stimulation was 24h with plate-bound CD3/28. **(B)** Representative gating of CCR8 expression in OT-I  $T_{mem}$  across stimulation conditions: Media alone (Mock), N4, and N4 + TGF- $\beta$ .

| TGF- $\beta$ Mouse Panel                                                   |          |          |          |                 |                 |
|----------------------------------------------------------------------------|----------|----------|----------|-----------------|-----------------|
| Reagent                                                                    | Fluor    | Dilution | Clone    | Vendor          | Cat.no          |
| Viability stain (PBS diluent) 20 min, on ice                               |          |          |          |                 |                 |
| LIVE/DEAD fixable aqua viability dye (AViD)                                | V510     | 1:250    | NA       | Thermo Fisher   | Cat#L34966      |
| Surface stain (FACS Wash diluent) 20 min, on ice                           |          |          |          |                 |                 |
| FC block (CD16/32)                                                         | Purified | 1:200    | 2.4G2    | BD Biosciences  | Cat# 553141     |
| CD4                                                                        | BV786    | 1:200    | GK1.5    | BD Biosciences  | Cat#563331      |
| CD8a                                                                       | PECF594  | 1:300    | 53-6.7   | BD Biosciences  | Cat#562283      |
| CD45.1                                                                     | BUV395   | 1:200    | A20      | BD Biosciences  | Cat#565212      |
| CD44                                                                       | AF700    | 1:200    | IM7      | Thermo Fisher   | Cat#560567      |
| PD-1                                                                       | BV605    | 1:100    | 29F.1A12 | Biolegend       | Cat#135220      |
| CD62L                                                                      | FITC     | 1:200    | MEL-14   | eBioscience     | Cat#11-0621-85  |
| Fix (eBioscience FOXP3 fixation buffer) 20 min, on ice                     |          |          |          |                 |                 |
| Intracellular stain (eBioscience FOXP3 perm buffer diluent) 30 min, on ice |          |          |          |                 |                 |
| Ki-67                                                                      | PECy7    | 1:800    | SolA15   | BioLegend       | Cat#52426       |
| TOX                                                                        | APC      | 1:100    | REA473   | Miltenyi Biotec | Cat#130-118-335 |
| IFN- $\gamma$                                                              | BUV737   | 1:200    | XMG1.2   | BD Biosciences  | Cat#612769      |
| GzmB                                                                       | PacBlu   | 1:100    | GB11     | BioLegend       | Cat#515408      |
| TCF1/7                                                                     | PE       | 1:40     | C63D9    | Cell Signaling  | Cat#144565      |

**Table S1: TGF- $\beta$  mouse panel**

Related to Fig. 1, 2, 3, Supplemental Fig. 1, 3, 4. Mouse flow cytometry panel for T cells isolated from OT-1 memory mice.

| TGF- $\beta$ Human Panel                                                          |          |          |            |                |             |
|-----------------------------------------------------------------------------------|----------|----------|------------|----------------|-------------|
| Reagent                                                                           | Fluor    | Dilution | Clone      | Vendor         | Cat.no      |
| Viability stain (PBS diluent) 20 min, room temp                                   |          |          |            |                |             |
| Human TruStain FcX (Fc-Block)                                                     | NA       | 1:25     | NA         | Biolegend      | Cat#422302  |
| LIVE/DEAD fixable blue viability dye (BViD)                                       | UV450    | 1:500    | NA         | Thermo Fisher  | Cat#L34962  |
| Surface stain (Brilliant Stain Buffer diluted 10x in FACS Wash) 20 min, room temp |          |          |            |                |             |
| CD8                                                                               | BUV395   | 1:80     | RPA-T8     | BD Biosciences | Cat#563795  |
| CXCR6                                                                             | BUV563   | 1:20     | 13B 1 E5   | BD Biosciences | Cat#748450  |
| CCR7                                                                              | BUV661   | 1:80     | 2-L1-A     | BD Biosciences | Cat#749824  |
| ICOS                                                                              | BUV737   | 1:20     | DX29       | BD Biosciences | Cat#749665  |
| CD25                                                                              | BV421    | 1:40     | 2A3        | BD Biosciences | Cat#564033  |
| CD28                                                                              | BV480    | 1:40     | CD28.2     | BD Biosciences | Cat#566110  |
| CD45RA                                                                            | BV570    | 1:160    | HI100      | BioLegend      | Cat#304132  |
| CD39                                                                              | BV605    | 1:40     | A1         | BioLegend      | Cat#328236  |
| CD69                                                                              | BV650    | 1:20     | FN50       | BD Biosciences | Cat#310933  |
| CD103                                                                             | BV750    | 1:160    | Ber-ACT8   | BD Biosciences | Cat#747099  |
| CCR5                                                                              | BV785    | 1:20     | 3A9        | BD Biosciences | Cat#565001  |
| PD1                                                                               | BB700    | 1:20     | EH12.1     | BD Biosciences | Cat#566460  |
| IL-1R1                                                                            | PE       | 1:20     | polyclonal | R&D Systems    | Cat#FAB269P |
| CXCR3                                                                             | PE-CF594 | 1:20     | 1C6/CXCR3  | BD Biosciences | Cat#562451  |
| CD137                                                                             | PE-Cy5   | 1:20     | 4B4-1      | BD Biosciences | Cat#551137  |
| IL18R1                                                                            | PE-Cy7   | 1:40     | H44        | BioLegend      | Cat#313812  |
| Fix (eBioscience FOXP3 fixation buffer) 20 min, room temp                         |          |          |            |                |             |
| Intracellular stain (eBioscience FOXP3 perm buffer diluent) 30 min, room temp     |          |          |            |                |             |
| IFN- $\gamma$                                                                     | FITC     | 1:40     | B27        | BD Biosciences | Cat#554700  |
| GzmB                                                                              | AF700    | 1:80     | GB11       | BD Biosciences | Cat#560213  |
| CCR8                                                                              | BV711    | 1:20     | 433H       | BD Biosciences | Cat#747575  |

**Table S2: TGF- $\beta$  human panel**

Related to Supplemental Fig. 2. Human flow cytometry panel for T cells isolated from human PBMC.

| Chemokine Receptor Panel: Mouse                                            |          |          |           |                |                |
|----------------------------------------------------------------------------|----------|----------|-----------|----------------|----------------|
| Reagent                                                                    | Fluor    | Dilution | Clone     | Vendor         | Cat.no         |
| Viability stain (PBS diluent) 20 min, on ice                               |          |          |           |                |                |
| LIVE/DEAD fixable aqua viability dye (AViD)                                | V510     | 1:250    | NA        | Thermo Fisher  | Cat#L34966     |
| Surface stain (FACS Wash diluent) 20 min, on ice                           |          |          |           |                |                |
| FC block (CD16/32)                                                         | Purified | 1:200    | 2.4G2     | BD Biosciences | Cat#553141     |
| CD4                                                                        | BV786    | 1:200    | GK1.5     | BD Biosciences | Cat#563331     |
| CD8a                                                                       | PECF594  | 1:300    | 53-6.7    | BD Biosciences | Cat#562283     |
| CD45.1                                                                     | BUV395   | 1:200    | A20       | BD Biosciences | Cat#565212     |
| CD44                                                                       | AF700    | 1:200    | IM7       | BD Biosciences | Cat#560567     |
| CD62L                                                                      | FITC     | 1:200    | MEL-14    | eBioscience    | Cat#11-0621-85 |
| CXCR3                                                                      | APC      | 1:100    | CXCR3-173 | BD Biosciences | Cat#562266     |
| CXCR6                                                                      | PECy7    | 1:200    | SA051D1   | BioLegend      | Cat#151118     |
| Fix (eBioscience FOXP3 fixation buffer) 20 min, on ice                     |          |          |           |                |                |
| Intracellular stain (eBioscience FOXP3 perm buffer diluent) 30 min, on ice |          |          |           |                |                |
| CCR8                                                                       | PE       | 1:200    | SA214G2   | Biologend      | Cat#150311     |
| IFN- $\gamma$                                                              | BUV737   | 1:200    | XMG1.2    | BD Biosciences | Cat#612769     |
| GzmB                                                                       | PacBlu   | 1:100    | GB11      | Biologend      | Cat#515408     |

**Table S3: Chemokine receptor mouse panel**

Related to Fig. 5, Supplemental Fig. 6. Mouse flow cytometry panel for T cells isolated from OT-1 memory mice.
